# Supplementary material for: ComprehENotes, an Instrument to Assess Patient Reading Comprehension of Electronic Health Record Notes: Development and Validation
Source: PubMed Central journal article supplement (PMC5943623; doi:10.2196/jmir.9380), 2018-04-25
Supplement: jmir_v20i4e139_app1.pdf [file jmir_v20i4e139_app1.pdf]

**Multimedia Appendix 1: Item parameter estimates and item information in the validation sample.**

| Item** | Slope* | Difficulty | Communality | Max. Information | Max. Location | Average Information |
|--------|--------|------------|-------------|------------------|---------------|---------------------|
| 1      | 1.0    | -1.1       | 0.26        | 0.18             | -0.79         | 0.08                |
| 2^     | 3.1    | -0.8       | 0.77        | 1.70             | -0.72         | 0.24                |
| 3      | 1.3    | -0.9       | 0.36        | 0.27             | -0.65         | 0.09                |
| 4      | 1.4    | -1.6       | 0.40        | 0.33             | -1.43         | 0.1                 |
| 5^     | 5.0    | -1.9       | 0.90        | 4.36             | -1.84         | 0.38                |
| 6^     | 2.6    | -1.1       | 0.70        | 1.15             | -1.03         | 0.19                |
| 7      | 1.5    | -0.3       | 0.42        | 0.36             | -0.11         | 0.11                |
| 8      | 2.3    | -0.5       | 0.64        | 0.87             | -0.41         | 0.17                |
| 9      | 1.5    | -1.0       | 0.45        | 0.40             | -0.78         | 0.11                |
| 10     | 1.6    | -2.1       | 0.46        | 0.42             | -1.91         | 0.12                |
| 11     | 1.4    | -0.6       | 0.40        | 0.33             | -0.43         | 0.1                 |
| 12     | 1.9    | -2.0       | 0.56        | 0.64             | -1.89         | 0.14                |
| 13^    | 2.4    | -1.4       | 0.67        | 0.99             | -1.30         | 0.18                |
| 14***  | 0.6    | -1.9       | 0.12        | 0.07             | -1.45         | 0.04                |
| 15     | 1.3    | -0.9       | 0.38        | 0.31             | -0.67         | 0.1                 |
| 16^    | 3.1    | -1.9       | 0.76        | 1.59             | -1.84         | 0.23                |
| 17     | 1.3    | -1.9       | 0.36        | 0.28             | -1.73         | 0.09                |
| 18     | 1.6    | -1.2       | 0.48        | 0.46             | -1.01         | 0.12                |
| 19     | 1.2    | -1.5       | 0.32        | 0.23             | -1.23         | 0.09                |
| 20     | 1.3    | -2.2       | 0.38        | 0.31             | -2.05         | 0.1                 |
| 21^    | 2.7    | -1.7       | 0.72        | 1.29             | -1.58         | 0.21                |
| 22     | 1.7    | -2.0       | 0.49        | 0.47             | -1.80         | 0.12                |
| 23^    | 2.6    | -1.8       | 0.70        | 1.17             | -1.66         | 0.2                 |
| 24     | 1.7    | -1.3       | 0.49        | 0.47             | -1.17         | 0.12                |
| 25     | 1.8    | -2.1       | 0.54        | 0.58             | -1.94         | 0.14                |
| 26     | 1.1    | -0.4       | 0.31        | 0.22             | -0.13         | 0.08                |
| 27     | 1.4    | -1.6       | 0.41        | 0.35             | -1.43         | 0.11                |
| 28     | 1.8    | -1.2       | 0.53        | 0.56             | -1.07         | 0.14                |
| 29^    | 3.6    | -1.8       | 0.82        | 2.22             | -1.72         | 0.27                |
| 30***  | 0.8    | -0.7       | 0.19        | 0.12             | -0.37         | 0.06                |
| 31^    | 2.4    | -1.8       | 0.66        | 0.97             | -1.66         | 0.18                |
| 32     | 1.7    | -1.7       | 0.49        | 0.48             | -1.56         | 0.13                |
| 33     | 1.7    | 0          | 0.49        | 0.47             | 0.12          | 0.12                |
| 34^    | 3.1    | -2.0       | 0.77        | 1.69             | -1.94         | 0.24                |
| 35     | 1.3    | -0.7       | 0.36        | 0.28             | -0.47         | 0.1                 |
| 36     | 2.0    | -1.3       | 0.59        | 0.70             | -1.14         | 0.15                |
| 37     | 1.5    | -1.6       | 0.45        | 0.40             | -1.40         | 0.12                |
| 38     | 1.4    | -2.1       | 0.40        | 0.32             | -1.94         | 0.1                 |

| Item**          | Slope* | Difficulty | Communality | Max. Information | Max. Location | Average Information |
|-----------------|--------|------------|-------------|------------------|---------------|---------------------|
| 39              | 2.0    | -1.0       | 0.58        | 0.70             | -0.88         | 0.15                |
| 40              | 2.2    | -0.8       | 0.63        | 0.83             | -0.73         | 0.17                |
| 41***           | 0.5    | 0.7        | 0.07        | 0.04             | 1.21          | 0.03                |
| 42              | 1.3    | -0.8       | 0.36        | 0.28             | -0.60         | 0.10                |
| 43              | 2.1    | -1.5       | 0.59        | 0.72             | -1.32         | 0.15                |
| 44***^          | 11.3   | -2.1       | 0.98        | 21.87            | -2.03         | 0.85                |
| 45              | 1.8    | -2.0       | 0.52        | 0.55             | -1.88         | 0.13                |
| 46              | 1.8    | -1.5       | 0.53        | 0.55             | -1.35         | 0.13                |
| 47^             | 4.3    | -1.3       | 0.87        | 3.20             | -1.20         | 0.32                |
| 48              | 1.7    | -1.9       | 0.51        | 0.52             | -1.72         | 0.13                |
| 49              | 1.6    | -1.2       | 0.47        | 0.44             | -1.01         | 0.12                |
| 50^             | 4.2    | -1.4       | 0.86        | 2.97             | -1.34         | 0.31                |
| 51              | 2.1    | -0.8       | 0.60        | 0.75             | -0.65         | 0.16                |
| 52^             | 3.9    | -1.8       | 0.84        | 2.61             | -1.77         | 0.29                |
| 53              | 1.4    | -0.7       | 0.39        | 0.31             | -0.49         | 0.10                |
| 54              | 1.5    | -0.6       | 0.45        | 0.41             | -0.40         | 0.12                |
| 55              | 1.9    | -1.8       | 0.56        | 0.62             | -1.64         | 0.14                |
| Test            |        |            |             | 44.24            | -2.01         | 8.77                |
| Test w/o 44     |        |            |             | 30.58            | -1.52         | 7.92                |
| Selected items  |        |            |             | 35.04            | -2.01         | 4.08                |
| Selected w/o 44 |        |            |             | 18.40            | -1.67         | 3.23                |

\*All slope parameters are significant after Holm's adjustment of multiplicity.

\*\*The constant guessing parameter has an estimate of 0.20, significantly different from zero.

\*\*\* These four items have extreme slope or intercept estimates.

^ Selected 14 items for short test.
